# Supplementary material
Source: HighWire-hosted journal article supplement (https://www.cmaj.ca/highwire/filestream/59340/field_highwire_adjunct_files/0/141372-res-1-at.pdf)
Supplement: 141372-res-1-at.pdf [file 141372-res-1-at.pdf]

## **Appendix 1: Supplemental information on data sources**

Population-level administrative databases at the Institute for Clinical Evaluative Sciences that were linked to data in the Cardiac Care Network database were as follows. The Canadian Institute for Health Information Discharge Abstract Database contains hospitalization data, including diagnosis codes to identify comorbid conditions. The National Ambulatory Care Reporting System database contains patient demographic, clinical, administrative and service-specific data for hospital-based ambulatory care. We used the Canadian Institute for Health Information Discharge Abstract Database and the National Ambulatory Care Reporting System database to determine hospital admissions for myocardial infarction. We used the Ontario Registered Persons Database to determine mortality. We obtained data on postal codes (for socioeconomic status and rurality index) through Statistics Canada. We used the Institute for Clinical Evaluative Sciences physician database for physician demographics, specialty and workload data. We used the Ontario Hypertension Database and the Ontario Diabetes Database to supplement the Cardiac Care Network data.
